# Supplementary material
Source: publisher figshare collection journal article supplement (https://tandf.figshare.com/ndownloader/files/14283653)
Supplement: Supplementary file 1 [file 14283653]

# Online Supplement for “Impact of the Cannibalization Effect between New and Remanufactured Products on Supply Chain Design and Operations”

by “Yanzi Zhang and Zhi-Hai Zhang”

**Figures S1 and S2** demonstrate the impact of  $\gamma$  on revenue/cost/pricing/demand in the linear model for different values of  $\sigma_{li}$  and  $\sigma_{2i}$ . In each figure, (a) shows the change in revenue and total cost associated with  $\gamma$ . (b) shows the prices of new and remanufactured products in  $\gamma$ . (c) shows the change in the demands for new and remanufactured products. (d) represents the change in total demand.

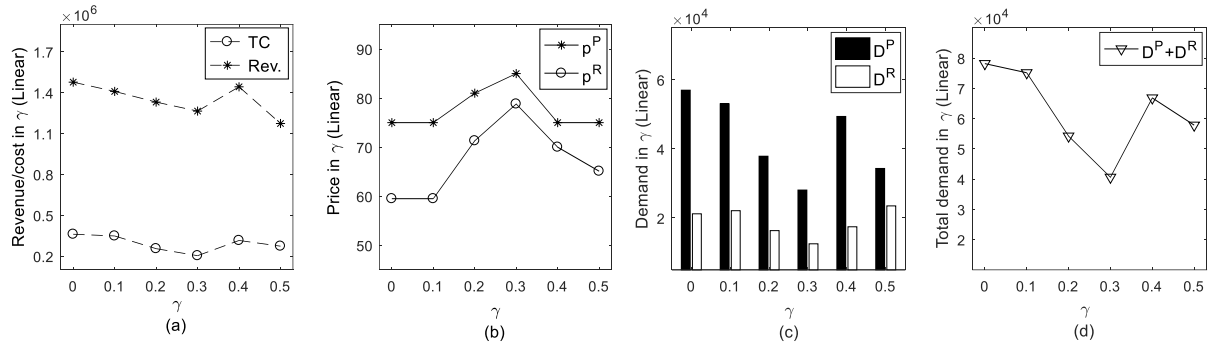

Figure S1 Impact of  $\gamma$  on revenue/cost/price/demand (linear model,  $\sigma_{li} = \sigma_{2i} = 0.1$ )

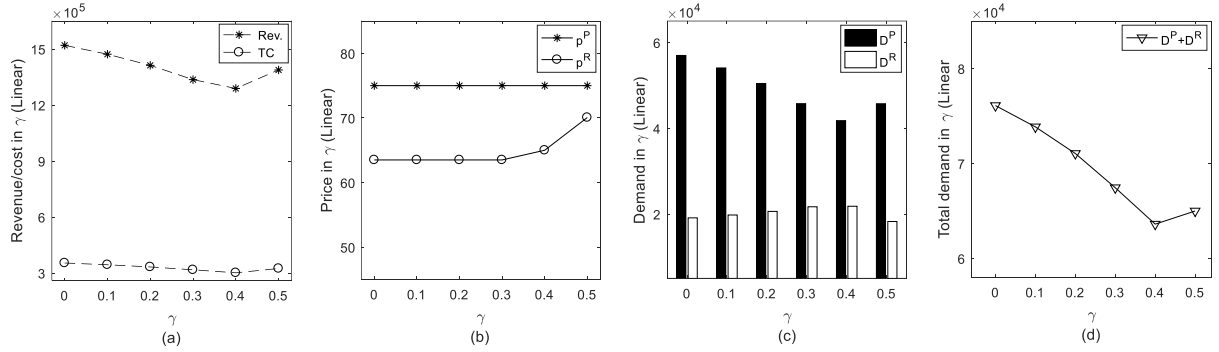

Figure S2 Impact of  $\gamma$  on revenue/cost/price/demand (linear model,  $\sigma_{li} = 0.1; \sigma_{2i} = 0.2$ )

**Figures S3 and S4** demonstrate the impact of  $\delta$  on revenue/cost/demand in the inverted model when  $\sigma_{li}$  and  $\sigma_{2i}$  take different values. In each figure, (a) and (b) show the change in revenue and total cost associated with  $\delta$ , respectively. (c) shows the change in the demands for new and remanufactured products and total demand.

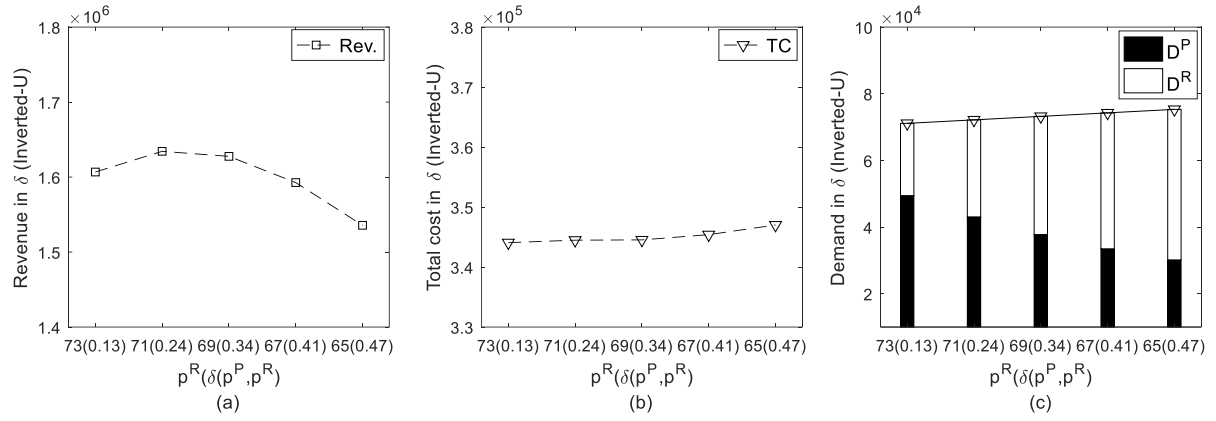

Figure S3 Impact of  $\delta$  on revenue/cost/demand (inverted-U model,  $\sigma_{ii} = 0.2; \sigma_{2i} = 0.1$ )

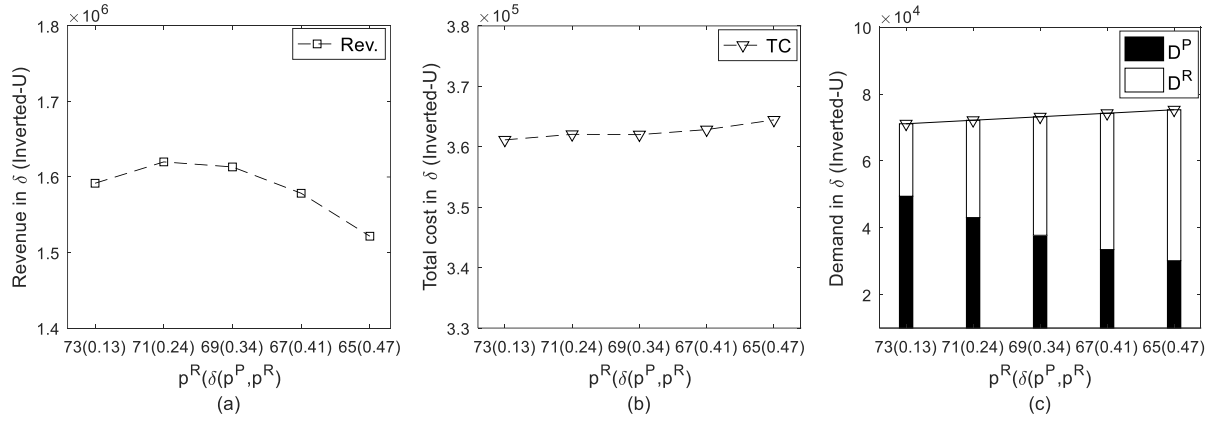

Figure S4 Impact of  $\delta$  on revenue/cost/demand (inverted-U model,  $\sigma_{ii} = 0.2; \sigma_{2i} = 2$ )

**Table S1** shows the supplementary experiment results of the number and position of selected DCs with variations in  $p^R(\delta)$  in the inverted-U model.

Table S1 Number and position of DCs in  $p^R(\delta)$  in the inverted-U model

| $ I = J $ | $\sigma_{ii}$ | $\sigma_{2i}$ | $p^R$<br>$\delta(p_i^P, p_i^R)$ | 73<br>0.13 | 71<br>0.24 | 69<br>0.34 | 67<br>0.41 | 65<br>0.47 |
|-----------|---------------|---------------|---------------------------------|------------|------------|------------|------------|------------|
| 25        | 0.1           | 0.1           | No. of DCs                      | 4          | 4          | 3          | 3          | 3          |
|           |               |               | Pos. of DCs                     | [1,4,6,22] | [1,4,6,22] | [0,4,6]    | [0,4,15]   | [0,4,15]   |
| 25        | 0.1           | 0.2           | No. of DCs                      | 4          | 4          | 3          | 3          | 3          |
|           |               |               | Pos. of DCs                     | [1,4,6,22] | [1,4,6,22] | [0,4,6]    | [0,4,15]   | [0,4,15]   |
| 25        | 0.1           | 0.5           | No. of DCs                      | 4          | 4          | 3          | 3          | 3          |
|           |               |               | Pos. of DCs                     | [1,4,6,22] | [1,4,6,22] | [0,4,6]    | [0,4,6]    | [0,4,15]   |
| 25        | 0.5           | 0.5           | No. of DCs                      | 3          | 3          | 3          | 3          | 3          |
|           |               |               | Pos. of DCs                     | [4,6,21]   | [4,6,21]   | [0,4,6]    | [0,4,6]    | [0,4,6]    |
| 25        | 1             | 1             | No. of DCs                      | 3          | 3          | 3          | 3          | 3          |
|           |               |               | Pos. of DCs                     | [4,6,21]   | [4,6,21]   | [0,1,4]    | [0,1,4]    | [0,4,6]    |
| 30        | 0.1           | 0.1           | No. of DCs                      | 5          | 4          | 4          | 4          | 4          |

|    |     |     |             |                 |              |              |               |               |
|----|-----|-----|-------------|-----------------|--------------|--------------|---------------|---------------|
| 30 | 0.1 | 0.2 | Pos. of DCs | [8,12,13,20,25] | [8,12,13,20] | [8,12,13,20] | [8,12,13,20]  | [8,12,20,23]  |
|    |     |     | No. of DCs  | 5               | 4            | 4            | 4             | 4             |
| 30 | 0.1 | 0.5 | Pos. of DCs | [8,12,13,20,25] | [8,12,13,20] | [8,12,13,20] | [8,12,13,20]  | [8,12, 20,23] |
|    |     |     | No. of DCs  | 4               | 4            | 4            | 4             | 4             |
| 30 | 0.5 | 0.5 | Pos. of DCs | [8,12,13,20]    | [8,12,13,20] | [8,12,13,20] | [8,12,13,20]  | [8,12, 20,23] |
|    |     |     | No. of DCs  | 4               | 4            | 4            | 4             | 4             |
| 30 | 1   | 1   | Pos. of DCs | [8,12,13,20]    | [8,12,13,20] | [8,12,13,20] | [8,12, 20,23] | [8,12, 20,23] |
|    |     |     | No. of DCs  | 4               | 4            | 4            | 4             | 4             |
|    |     |     | Pos. of DCs | [8,12,13,20]    | [8,12,13,20] | [8,12,13,20] | [8,12, 20,23] | [8,12, 20,23] |

**Table S2** demonstrates the experimental results for the comparison between uniform and independent policies in the linear model

Table S2 Comparison between uniform and independent policies in the linear model

| $ I = J $ | T  | $\sigma_{2i}$ | $\gamma$ | Rev_I  | Rev_U  | $\bar{\nu}$  |
|-----------|----|---------------|----------|--------|--------|--------------|
| 10        | 7  | 0.1           | 0.3      | 588092 | 586372 | <b>0.29%</b> |
| 10        | 7  | 0.2           | 0.3      | 587759 | 586006 | <b>0.30%</b> |
| 10        | 7  | 0.5           | 0.3      | 586267 | 584189 | <b>0.35%</b> |
| 10        | 14 | 0.1           | 0.3      | 576311 | 574623 | <b>0.29%</b> |
| 10        | 14 | 0.2           | 0.3      | 575893 | 574180 | <b>0.30%</b> |
| 10        | 14 | 0.5           | 0.3      | 574073 | 572268 | <b>0.31%</b> |
| 10        | 30 | 0.1           | 0.2      | 596214 | 595655 | <b>0.09%</b> |
| 10        | 30 | 0.2           | 0.2      | 595744 | 595189 | <b>0.09%</b> |
| 10        | 60 | 0.5           | 0.2      | 593790 | 592919 | <b>0.15%</b> |
| 10        | 60 | 0.1           | 0.1      | 572292 | 569580 | <b>0.47%</b> |
| 10        | 60 | 0.2           | 0.1      | 571738 | 568917 | <b>0.49%</b> |
| 10        | 60 | 0.5           | 0.1      | 569410 | 566454 | <b>0.52%</b> |
| 15        | 7  | 0.1           | 0.3      | 830875 | 829032 | <b>0.22%</b> |
| 15        | 7  | 0.2           | 0.3      | 830349 | 828559 | <b>0.22%</b> |
| 15        | 7  | 0.5           | 0.3      | 828318 | 826224 | <b>0.25%</b> |
| 15        | 14 | 0.1           | 0.3      | 814819 | 812365 | <b>0.30%</b> |
| 15        | 14 | 0.2           | 0.3      | 814300 | 811776 | <b>0.31%</b> |
| 15        | 14 | 0.5           | 0.3      | 812054 | 809325 | <b>0.34%</b> |
| 15        | 30 | 0.1           | 0.2      | 848885 | 848079 | <b>0.09%</b> |
| 15        | 30 | 0.2           | 0.2      | 848316 | 847516 | <b>0.09%</b> |
| 15        | 60 | 0.5           | 0.2      | 845607 | 844797 | <b>0.10%</b> |
| 15        | 60 | 0.1           | 0.1      | 817662 | 813123 | <b>0.56%</b> |
| 15        | 60 | 0.2           | 0.1      | 816898 | 812460 | <b>0.54%</b> |
| 15        | 60 | 0.5           | 0.1      | 813809 | 809402 | <b>0.54%</b> |

**Table S3** shows the variation of specific prices for each retailer with respect to cannibalization coefficient in the linear model. In what follows,  $\hat{p}^P$  represents the price of new products for each retailer and  $\hat{p}^R$  means the price of remanufactured products for each retailer.

Table S3 specific prices for each retailer with respect to  $\gamma$  in the linear model

| Retailer<br>ID | $\gamma=0$  |             | $\gamma=0.1$ |             | $\gamma=0.2$ |             | $\gamma=0.3$ |             | $\gamma=0.4$ |             | $\gamma=0.5$ |             |
|----------------|-------------|-------------|--------------|-------------|--------------|-------------|--------------|-------------|--------------|-------------|--------------|-------------|
|                | $\hat{p}^P$ | $\hat{p}^R$ | $\hat{p}^P$  | $\hat{p}^R$ | $\hat{p}^P$  | $\hat{p}^R$ | $\hat{p}^P$  | $\hat{p}^R$ | $\hat{p}^P$  | $\hat{p}^R$ | $\hat{p}^P$  | $\hat{p}^R$ |
| 0              |             |             |              |             | 85           | 79.2        |              |             |              |             |              |             |
| 1              |             |             |              |             | 75           | 59.5        |              |             |              |             |              |             |
| 2              |             |             |              |             | 85           | 79.2        |              |             |              |             |              |             |
| 3              |             |             |              |             | 85           | 79.2        |              |             |              |             |              |             |
| 4              |             |             |              |             | 75           | 59.5        |              |             |              |             |              |             |
| 5              |             |             |              |             | 85           | 79.2        |              |             |              |             |              |             |
| 6              |             |             |              |             | 75           | 59.5        |              |             |              |             |              |             |
| 7              |             |             |              |             | 85           | 79.2        |              |             |              |             |              |             |
| 8              |             |             |              |             | 85           | 79.2        |              |             |              |             |              |             |
| 9              | 75          | 59.5        | 75           | 59.5        | 75           | 59.5        | 85           | 75.8        | 75           | 70          | 75           | 65.1        |
| 10             |             |             |              |             | 85           | 79.2        |              |             |              |             |              |             |
| 11             |             |             |              |             | 85           | 79.2        |              |             |              |             |              |             |
| 12             |             |             |              |             | 85           | 79.2        |              |             |              |             |              |             |
| 13             |             |             |              |             | 85           | 79.2        |              |             |              |             |              |             |
| 14             |             |             |              |             | 85           | 79.2        |              |             |              |             |              |             |
| 15             |             |             |              |             | 75           | 59.5        |              |             |              |             |              |             |
| 16             |             |             |              |             | 75           | 59.5        |              |             |              |             |              |             |
| 17             |             |             |              |             | 75           | 59.5        |              |             |              |             |              |             |
| 18             |             |             |              |             | 85           | 79.2        |              |             |              |             |              |             |
| 19             |             |             |              |             | 75           | 59.5        |              |             |              |             |              |             |

**Table S4** shows the variation of specific prices for each retailer with respect to periodic review (T) in the linear model

Table S4 specific prices for each retailer with respect to T in the linear model

| Retailer<br>ID | T=7         |             | T=14        |             | T=30        |             | T=60        |             | T=90        |             |
|----------------|-------------|-------------|-------------|-------------|-------------|-------------|-------------|-------------|-------------|-------------|
|                | $\hat{p}^P$ | $\hat{p}^R$ |
| 0              |             |             |             |             |             |             | 85          | 81.5        |             |             |
| 1              |             |             |             |             |             |             | 85          | 81.5        |             |             |
| 2              |             |             |             |             |             |             | 85          | 81.5        |             |             |
| 3              |             |             |             |             |             |             | 85          | 81.5        |             |             |
| 4              |             |             |             |             |             |             | 85          | 81.5        |             |             |
| 5              |             |             |             |             |             |             | 85          | 81.5        |             |             |
| 6              |             |             |             |             |             |             | 75          | 59.5        |             |             |
| 7              | 75          | 59.5        | 75          | 59.5        | 75          | 59.5        | 85          | 81.5        | 85          | 81.5        |
| 8              |             |             |             |             |             |             | 85          | 81.5        |             |             |
| 9              |             |             |             |             |             |             | 85          | 81.5        |             |             |
| 10             |             |             |             |             |             |             | 85          | 81.5        |             |             |
| 11             |             |             |             |             |             |             | 85          | 81.5        |             |             |
| 12             |             |             |             |             |             |             | 75          | 59.5        |             |             |
| 13             |             |             |             |             |             |             | 85          | 81.5        |             |             |
| 14             |             |             |             |             |             |             | 85          | 81.5        |             |             |
| 15             |             |             |             |             |             |             | 85          | 81.5        |             |             |

|    |    |      |
|----|----|------|
| 16 | 85 | 81.5 |
| 17 | 75 | 59.5 |
| 18 | 85 | 81.5 |
| 19 | 85 | 81.5 |

**Figure S5** illustrates the impact of manufacturer capacity ( $Cap^{MF}$ ) on the revenue, average price, and total demand in the inverted-U model. In each figure, (a) shows the change in revenue associated with  $Cap^{MF}$ . (b) shows the change in the demands for new and remanufactured products. (c) represents the average prices of new and remanufactured products in  $Cap^{MF}$ .

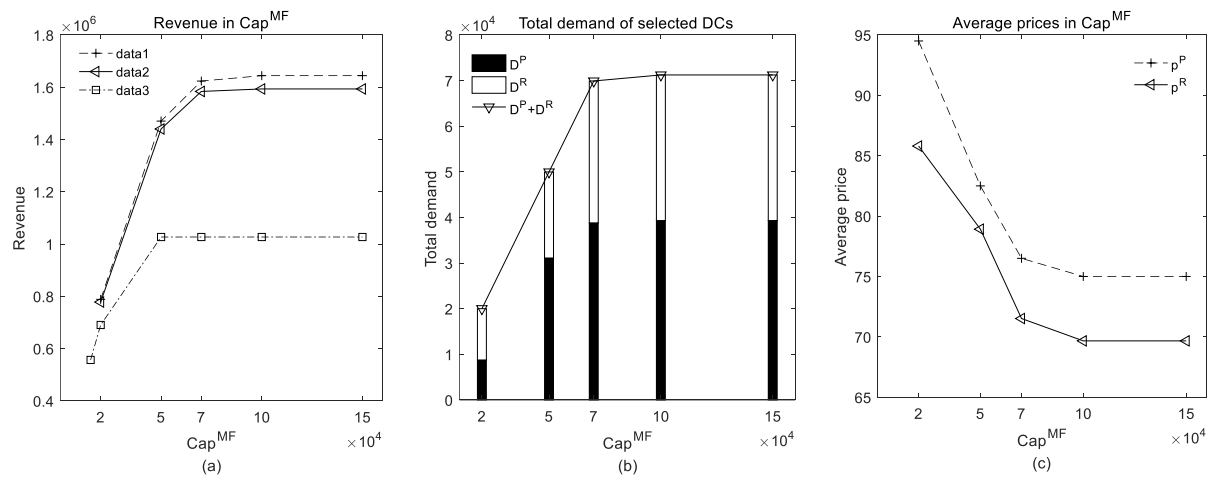

Figure S5 Change of revenue/average price/total demand in  $Cap^{MF}$  in the inverted-U model

**Table S5** presents the impact of manufacturer capacity ( $Cap^{MF}$ ) on the number and position of selected DCs in the inverted-U model.

Table S5 number and position of DCs when  $Cap^{MF}$  changes in inverted-U model

| $Cap^{MF}$  | 20000  | 50000   | 70000           | 100000          | 150000          |
|-------------|--------|---------|-----------------|-----------------|-----------------|
| No. of DCs  | 2      | 3       | 5               | 5               | 5               |
| Pos. of DCs | [1,18] | [1,6,7] | [6,12,16,17,18] | [6,10,16,17,18] | [6,10,16,17,18] |
